# Supplementary material for: Palbociclib plus letrozole as first-line therapy in estrogen receptor-positive/human epidermal growth factor receptor 2-negative advanced breast cancer with extended follow-up
Source: Springer Nature journal article supplement (doi:10.1007/s10549-018-05125-4), 2019-01-10
Supplement: MOESM1 [file 16390100]

**Palbociclib plus letrozole as first-line therapy in estrogen receptor–positive/human epidermal growth factor receptor 2–negative advanced breast cancer with extended follow-up**

**Journal Name:** *Breast Cancer Research and Treatment*

H. S. Rugo,<sup>1\*</sup> R. S. Finn,<sup>2</sup> V. Diéras,<sup>3,4</sup> J. Ettl,<sup>5</sup> O. Lipatov,<sup>6</sup> A. A. Joy,<sup>7</sup> N. Harbeck,<sup>8</sup> A. Castrellon,<sup>9</sup> S. Iyer,<sup>10</sup> D. R. Lu,<sup>11</sup> A. Mori,<sup>12</sup> E. R. Gauthier,<sup>13</sup> C. Huang Bartlett,<sup>14</sup> K. A. Gelmon,<sup>15</sup> D. J. Slamon<sup>2</sup>

**Address correspondence to:**

Dr. Hope S. Rugo

Department of Medicine (Hematology/Oncology)

University of California San Francisco

Helen Diller Family Comprehensive Cancer Center

1600 Divisadero St, 2nd Floor

San Francisco, CA 94115 USA

Email: [hope.rugo@ucsf.edu](mailto:hope.rugo@ucsf.edu)

## Appendix: Supplementary Material

**Table S1.** List of Independent Ethics Committees or Institutional Review Boards

### AUSTRALIA

| <b><u>Study Site Number</u></b> | <b><u>Independent Ethics Committee or Institutional Review Board Address(es)</u></b>                                      |
|---------------------------------|---------------------------------------------------------------------------------------------------------------------------|
| 1150                            | Hunter New England Human Research Ethics Committee<br>Locked Bag No. 1<br>New Lambton, NSW 2305<br>AUSTRALIA              |
| 1151                            | Hunter New England Human Research Ethics Committee<br>Locked Bag No. 1<br>New Lambton, NSW 2305<br>AUSTRALIA              |
| 1152                            | Hunter New England Human Research Ethics Committee<br>Locked Bag No. 1<br>New Lambton, NSW 2305<br>AUSTRALIA              |
| 1153                            | Hunter New England Human Research Ethics Committee<br>Locked Bag No. 1<br>New Lambton, NSW 2305<br>AUSTRALIA              |
| 1154                            | Epworth HealthCare Research and Ethics Committee<br>89 Bridge Road, Epworth Healthcare<br>Richmond, VIC 3121<br>AUSTRALIA |
| 1155                            | Hunter New England Human Research Ethics Committee<br>Locked Bag No. 1<br>New Lambton, NSW 2305<br>AUSTRALIA              |

| <b><u>Study Site Number</u></b> | <b><u>Independent Ethics Committee or Institutional Review Board Address(es)</u></b>                                                                                     |
|---------------------------------|--------------------------------------------------------------------------------------------------------------------------------------------------------------------------|
| 1156                            | Hunter New England Human Research Ethics Committee<br>Locked Bag No. 1<br>New Lambton, NSW 2305<br>AUSTRALIA                                                             |
| 1157                            | Bellberry Human Research Ethics Committee<br>129 Glen Osmond Road<br>Eastwood, SOUTH AUSTRALIA 5063<br>AUSTRALIA                                                         |
| 1159                            | Hunter New England Human Research Ethics Committee<br>Locked Bag No. 1<br>New Lambton, NSW 2305<br>AUSTRALIA                                                             |
| 1160                            | Hunter New England Human Research Ethics Committee<br>Locked Bag No. 1<br>New Lambton, NSW 2305<br>AUSTRALIA                                                             |
| 1164                            | Hunter New England Human Research Ethics Committee<br>Hunter New England Research Ethics and Governance Unit<br>Locked Bag 1<br>New Lambton, NSW 2305<br>AUSTRALIA       |
| 1166                            | Hunter New England Human Research Ethics Committee<br>Locked Bag No. 1<br>New Lambton, NSW 2305<br>AUSTRALIA                                                             |
| 1200                            | Research Ethics Committee, Royal Adelaide Hospital<br>Level 3, Hansen Institute, IMVS Building, Royal Adelaide Hospital, North Terrace<br>Adelaide, SA 5000<br>AUSTRALIA |

**Study Site Number**

1279

**Independent Ethics Committee or Institutional Review Board Address(es)**

Royal Perth Hospital Human Research Ethics Committee  
Royal Perth Hospital, Ethics Office, Level 5 Colonial House  
Perth, WA 6001  
AUSTRALIA

## **BELGIUM**

| <b><u>Study Site Number</u></b> | <b><u>Independent Ethics Committee or Institutional Review Board Address(es)</u></b>                                                                                                                                                                                             |
|---------------------------------|----------------------------------------------------------------------------------------------------------------------------------------------------------------------------------------------------------------------------------------------------------------------------------|
| 1036                            | Commissie Medische Ethiek van Universitaire Ziekenhuizen KU Leuven<br>Campus Gasthuisberg, Herestraat 49<br>Leuven, 3000<br>BELGIUM                                                                                                                                              |
| 1039                            | Commissie Medische Ethiek van de Universitaire Ziekenhuis K.U. Leuven<br>Campus Gasthuisberg E330, Herestraat 49<br>Leuven, 3000<br>BELGIUM                                                                                                                                      |
| 1054                            | COMMISSIE MEDISCHE ETHIEK VAN DE UNIVERSITAIRE ZIEKENHUIZEN KU LEUVEN<br>Campus Gasthuisberg, Herestraat 49<br>Leuven, B-3000<br>BELGIUM<br><br>Comite Ethique CHU Sart Tilman<br>1, avenue de l'hopital/Domaine universitaire B35, Tour 2, niveau -2E<br>Liege, 4000<br>BELGIUM |
| 1076                            | Commissie Medische Ethiek van Universitaire Ziekenhuizen KU Leuven<br>Campus Gasthuisberg, Herestraat 49<br>Leuven<br>BELGIUM                                                                                                                                                    |
| 1113                            | COMMISSIE MEDISCHE ETHIEK VAN DE UNIVERSITAIRE ZIEKENHUIZEN KU LEUVEN<br>Campus Gasthuisberg, Herestraat 49<br>Leuven, B-3000<br>BELGIUM                                                                                                                                         |
| 1142                            | Commissie Medische Ethiek van Universitaire Ziekenhuizen KU Leuven,<br>Campus Gasthuisberg, Herestraat 49,<br>Leuven, 3000<br>BELGIUM                                                                                                                                            |

| <b><u>Study Site Number</u></b> | <b><u>Independent Ethics Committee or Institutional Review Board Address(es)</u></b>                                               |
|---------------------------------|------------------------------------------------------------------------------------------------------------------------------------|
| 1192                            | Commissie Medische Ethiek van Universitaire Ziekenuizen KU Leuven<br>Campus Gasthuisberg, Herestraat 49<br>Leuven, 3000<br>BELGIUM |
| 1262                            | Commissie Medische Ethiek van Universitaire Ziekenuizen KU Leuven<br>Campus Gasthuisberg, Herestraat 49<br>Leuven, 3000<br>BELGIUM |

## CANADA

| <b><u>Study Site Number</u></b> | <b><u>Independent Ethics Committee or Institutional Review Board Address(es)</u></b>                                                                                    |
|---------------------------------|-------------------------------------------------------------------------------------------------------------------------------------------------------------------------|
| 1074                            | Comite d'ethique de la recherche et de l'Evaluation des Technologies de la Sante<br>5400 Gouin Boulevard West, Hopital du Sacre-Coeur<br>Montreal, QC H4J 1C5<br>CANADA |
| 1205                            | Centre for Applied Ethics, McGill University Health Centre (MUHC)<br>2155 Guy Street, Room 223.09<br>Montreal, QC H3H 2R9<br>CANADA                                     |
| 1219                            | Comite d'ethique de la recherche du CHU de Quebec<br>10, rue de l'Espinay, Universite Laval<br>Quebec, QC G1L 3L5<br>CANADA                                             |
| 1220                            | Ontario Cancer Research Ethics Board<br>661 University Avenue, Ontario Cancer Research Ethics Board, MaRS Centre Suite 510<br>Toronto, ON M5G 0A3<br>CANADA             |
| 1225                            | Nova Scotia Health Authority Research Ethics Board<br>5790 University Avenue, Room 118<br>Halifax, NS B3H 1V7<br>CANADA                                                 |
| 1226                            | Health Research Ethics Board of Alberta - Cancer Committee<br>10104-103 Avenue NW, 1500<br>Edmonton, AB T5J4A7<br>CANADA                                                |
| 1231                            | UBC BCCA Research Ethics Board (BCCA REB)<br>Fairmont Medical Building, BC Cancer Agency, 750 West Broadway, Suite 902<br>Vancouver, BC V5Z 1H5<br>CANADA               |

| <b><u>Study Site Number</u></b> | <b><u>Independent Ethics Committee or Institutional Review Board Address(es)</u></b>                                                                                                                                                  |
|---------------------------------|---------------------------------------------------------------------------------------------------------------------------------------------------------------------------------------------------------------------------------------|
| 1232                            | Ontario Cancer Research Ethics Board<br>MaRS Centre<br>c/o Ontario Institute for Cancer Research, 661 University Avenue, Suite 510<br>Toronto, ON M5G 0A3<br>CANADA                                                                   |
| 1233                            | Ontario Cancer Research Ethics Board<br>MaRS Centre, South Tower<br>C/o Ontario Institute for Cancer Research, 101 College Street, Suite 800<br>Toronto, ON M5G 0A3<br>CANADA                                                         |
| 1239                            | Ontario Cancer Research Ethics Board (OCREB)<br>661 University Avenue, MaRS Centre - Suite 510<br>Toronto, ON M5G 0A3<br>CANADA                                                                                                       |
| 1240                            | Ontario Cancer Research Ethics Board<br>MaRS Centre, South Tower<br>C/o Ontario Institute for Cancer Research, 101 College Street, Suite 800<br>Toronto, ON M5G 0A3<br>CANADA                                                         |
| 1241                            | University of Saskatchewan BioMedical Research Ethics Board (Bio-REB)<br>1607 110 Gymnasium Place, Research Ethics Office, University of Saskatchewan, NRC, Plant Biotechnology Research Institute<br>Saskatoon, SK S7N 4J8<br>CANADA |
| 1273                            | Ontario Cancer Research Ethics Board<br>MaRS Centre, South Tower<br>101 College Street, Suite 800<br>Toronto, ON M5G 0A3<br>CANADA                                                                                                    |
| 1282                            | UBC BCCA Research Ethics Board (BCCA REB)<br>Fairmont Medical Building, BC Cancer Agency, 750 West Broadway, Suite 902<br>Vancouver, BC V5Z 1H5<br>CANADA                                                                             |



**Study Site Number**

1291

**Independent Ethics Committee or Institutional Review Board Address(es)**

Health Research Ethics Board of Alberta - Cancer Committee  
10104-103 Ave NWC/O Alberta Innovates - Health Solutions, 1500  
Edmonton, AB T5J 4A7  
CANADA

**CZECH REPUBLIC**

**Study Site Number**

1097

**Independent Ethics Committee or Institutional Review Board Address(es)**

Eticka komise FN Olomouc

I.P. Pavlova 6

Olomouc, 775 20

CZECH REPUBLIC

Eticka komise pro multicentricke klinicke hodnoceni FN Motol

Fakultni nemocnice Motol, V uvalu 84

Praha 5, 15006

CZECH REPUBLIC

1288

Eticka komise pro multicentricke klinicke hodnoceni FN Motol

Fakultni nemocnice Motol, V uvalu 84

Praha 5, 15006

CZECH REPUBLIC

Eticka komise

Sokolska 581, FN Hradec Kralove

Hradec Kralove, 500 05

CZECH REPUBLIC

**FRANCE**

| <b><u>Study Site Number</u></b> | <b><u>Independent Ethics Committee or Institutional Review Board Address(es)</u></b>     |
|---------------------------------|------------------------------------------------------------------------------------------|
| 1037                            | CPP Ile de France 3<br>89 rue d'Assas, Hopital Tarnier<br>Paris, 75006<br>FRANCE         |
| 1062                            | CPP Ile de France 3<br>Hôpital Tarnier, 89, rue d'Assas<br>PARIS, 75006<br>FRANCE        |
| 1063                            | CPP Ile de France 3<br>Hôpital Tarnier, 89, rue d'Assas<br>PARIS, 75006<br>FRANCE        |
| 1064                            | CPP Ile de France 3<br>Hôpital TARNIER, 89, rue d'Assas<br>PARIS, 75006<br>FRANCE        |
| 1065                            | CPP Ile de France 3<br>Hôpital TARNIER, 89, rue d'Assas<br>PARIS, 75006<br>FRANCE        |
| 1066                            | CPP Ile de France 3<br>89 rue d'Assas, Hopital Tarnier<br>Paris, 75006<br>FRANCE         |
| 1182                            | CPP Ile de France 3<br>Hôpital Tarnier Cochin, 89, rue d'Assas<br>PARIS, 75006<br>FRANCE |

| <b><u>Study Site Number</u></b> | <b><u>Independent Ethics Committee or Institutional Review Board Address(es)</u></b>     |
|---------------------------------|------------------------------------------------------------------------------------------|
| 1183                            | CPP Ile de France 3<br>Hôpital TARNIER, 89, rue d'Assas<br>PARIS, 75006<br>FRANCE        |
| 1285                            | CPP Ile de France 3<br>Hôpital Tarnier Cochin, 89, rue d'Assas<br>PARIS, 75006<br>FRANCE |
| 1293                            | CPP Ile de France 3<br>Hôpital Tarnier, 89, rue d'Assas<br>PARIS, 75006<br>FRANCE        |
| 1296                            | CPP Ile de France 3<br>Hôpital Tarnier, 89, rue d'Assas<br>PARIS, 75006<br>FRANCE        |
| 1309                            | CPP Ile de France 3<br>Hôpital Tarnier Cochin, 89, rue d'Assas<br>PARIS, 75006<br>FRANCE |
| 1317                            | CPP Ile de France 3<br>Hôpital Tarnier Cochin, 89, rue d'Assas<br>PARIS, 75006<br>FRANCE |
| 1318                            | CPP Ile de France 3<br>Hôpital Tarnier, 89, rue d'Assas<br>PARIS, 75006<br>FRANCE        |

## GERMANY

| <b><u>Study Site Number</u></b> | <b><u>Independent Ethics Committee or Institutional Review Board Address(es)</u></b>                                                |
|---------------------------------|-------------------------------------------------------------------------------------------------------------------------------------|
| 1041                            | Ethikkommission der Med. Fakultät der LMU München<br>Pettenkoferstr. 8a, Prof. Dr. Wolfgang Eisenmenger<br>80336 Munchen<br>GERMANY |
| 1042                            | Ethikkommission der Med. Fakultät der LMU München<br>Pettenkoferstr. 8a, Prof. Dr. Wolfgang Eisenmenger<br>80336 Munchen<br>GERMANY |
| 1045                            | Ethikkommission der Med. Fakultät der LMU München<br>Pettenkoferstr. 8a, Prof. Dr. Wolfgang Eisenmenger<br>80336 Munchen<br>GERMANY |
| 1046                            | Ethikkommission der Med. Fakultät der LMU München<br>Pettenkoferstr. 8a, Prof. Dr. Wolfgang Eisenmenger<br>80336 Munchen<br>GERMANY |
| 1119                            | Ethikkommission der Med. Fakultät der LMU München<br>Pettenkoferstr. 8a, Prof. Dr. Wolfgang Eisenmenger<br>80336 Munchen<br>GERMANY |
| 1135                            | Ethikkommission der Med. Fakultät der LMU München<br>Pettenkoferstr. 8a, Prof. Dr. Wolfgang Eisenmenger<br>80336 Munchen<br>GERMANY |
| 1136                            | Aerztekammer Nordrhein<br>Tersteegenstr. 31<br>Duesseldorf, 40474<br>GERMANY                                                        |

| <b><u>Study Site Number</u></b> | <b><u>Independent Ethics Committee or Institutional Review Board Address(es)</u></b>                                                                                            |
|---------------------------------|---------------------------------------------------------------------------------------------------------------------------------------------------------------------------------|
|                                 | Ethikkommission der Med. Fakultät der LMU München<br>Pettenkoferstr. 8a, Prof. Dr. Wolfgang Eisenmenger<br>80336 Munchen<br>GERMANY                                             |
| 1137                            | Ethikkommission der Med. Fakultät der LMU München<br>Pettenkoferstr. 8a, Prof. Dr. Wolfgang Eisenmenger<br>80336 Munchen<br>GERMANY                                             |
| 1139                            | Ethikkommission der Med. Fakultät der LMU München<br>Pettenkoferstr. 8a, Prof. Dr. Wolfgang Eisenmenger<br>80336 Munchen<br>GERMANY                                             |
| 1184                            | Ethikkommission der Med. Fakultät der LMU München<br>Pettenkoferstr. 8a, Prof. Dr. Wolfgang Eisenmenger<br>80336 Munchen<br>GERMANY                                             |
| 1194                            | Ethikkommission der Med. Fakultät der LMU München<br>Pettenkoferstr. 8 IV, Zi. 1 4.07 bis I 4.10 (Hausanschrift), Postanschrift: Pettenkoferstr. 8a<br>Munich, 80336<br>GERMANY |
| 1207                            | Ethikkommission der Med. Fakultät der LMU München<br>Pettenkoferstr. 8a, Prof. Dr. Wolfgang Eisenmenger<br>80336 Munchen<br>GERMANY                                             |
| 1209                            | Ethikkommission der Med. Fakultät der LMU München<br>Pettenkoferstr. 8a, Prof. Dr. Wolfgang Eisenmenger<br>80336 Munchen<br>GERMANY                                             |
| 1210                            | Ethikkommission der Med. Fakultät der LMU München<br>Pettenkoferstr. 8a, Prof. Dr. Wolfgang Eisenmenger<br>80336 Munchen<br>GERMANY                                             |

| <b><u>Study Site Number</u></b> | <b><u>Independent Ethics Committee or Institutional Review Board Address(es)</u></b>                                                                                                          |
|---------------------------------|-----------------------------------------------------------------------------------------------------------------------------------------------------------------------------------------------|
| 1211                            | Ethikkommission de Landesarztekkammer Hessen<br>Im Vogelsgesang 3<br>Frankfurt, 60488<br>GERMANY                                                                                              |
| 1229                            | Ethikkommission der Med. Fakultät der LMU München<br>Ethikkommission der Med. Fakultät der LMU München, Prof. Dr. Wolfgang Eisenmenger Pettenkoferstr. 8a<br>Munich, BAVARIA 80336<br>GERMANY |
| 1302                            | Ethikkommission der Med. Fakultät der LMU München<br>Pettenkoferstr. 8a, Prof. Dr. Wolfgang Eisenmenger<br>80336 Munchen<br>GERMANY                                                           |
| 1303                            | Ethikkommission der Med. Fakultät der LMU München<br>Pettenkoferstr. 8a, Prof. Dr. Wolfgang Eisenmenger<br>Munich, 80336<br>GERMANY                                                           |
| 1312                            | Ethikkommission der Med. Fakultät der LMU München<br>Pettenkoferstr. 8a, Prof. Dr. Wolfgang Eisenmenger<br>80336 Munchen<br>GERMANY                                                           |

## HUNGARY

| <b><u>Study Site Number</u></b> | <b><u>Independent Ethics Committee or Institutional Review Board Address(es)</u></b>                                           |
|---------------------------------|--------------------------------------------------------------------------------------------------------------------------------|
| 1061                            | Egeszsegugyi Tudomanyos Tanacs<br>Zrinyi u.3<br>Budapest, 1051<br>HUNGARY                                                      |
| 1100                            | Egeszsegugyi Tudomanyos Tanacs<br>Zrinyi u.3<br>Budapest, 1051<br>HUNGARY                                                      |
| 1145                            | Egeszsegugyi Tudomanyos Tanacs Klinikai<br>Arany Janos u. 6-8., Farmakologiai Etikai Bizottsag<br>Budapest, 1051<br>HUNGARY    |
| 1227                            | Egeszsegugyi Tudomanyos Tanacs<br>Klinikai Farmakologiai Etikai Bizottsaga<br>Arany Janos u. 6-8.<br>Budapest, 1051<br>HUNGARY |
| 1228                            | Egeszsegugyi Tudomanyos Tanacs<br>Klinikai Farmakologiai Etikai Bizottsaga<br>Arany Janos u. 6-8.<br>Budapest, 1051<br>HUNGARY |
| 1284                            | Egeszsegugyi Tudomanyos Tanacs<br>Zrinyi u.3<br>Budapest, 1051<br>HUNGARY                                                      |



**IRELAND**

| <b><u>Study Site Number</u></b> | <b><u>Independent Ethics Committee or Institutional Review Board Address(es)</u></b>                                                                                                                                                                                      |
|---------------------------------|---------------------------------------------------------------------------------------------------------------------------------------------------------------------------------------------------------------------------------------------------------------------------|
| 1068                            | Clinical Research Ethics Committee of the Cork Teaching Hospitals<br>6 Little Hanover Street, Lancaster Hall<br>Cork<br>IRELAND                                                                                                                                           |
| 1069                            | Clinical Research Ethics Committee of the Cork Teaching Hospitals<br>6 Little Hanover Street, Lancaster Hall<br>Cork<br>IRELAND<br><br>Mater Multi-Centre Clinical Trials Advisory Group<br>Eccles Street, Mater Misericordiae University Hospital<br>Dublin 7<br>IRELAND |
| 1098                            | Clinical Research Ethics Committee of the Cork Teaching Hospitals<br>6 Little Hanover Street, Lancaster Hall<br>Cork<br>IRELAND<br><br>Mater Multi-Centre Clinical Trials Advisory Group<br>Eccles Street, Mater Private Hospital<br>Dublin 7<br>IRELAND                  |
| 1101                            | Clinical Research Ethics Committee of the Cork Teaching Hospitals<br>6 Little Hanover Street, Lancaster Hall<br>Cork<br>IRELAND                                                                                                                                           |
| 1102                            | Clinical Research Ethics Committee of the Cork Teaching Hospitals<br>6 Little Hanover Street, Lancaster Hall<br>Cork<br>IRELAND                                                                                                                                           |

| <b><u>Study Site Number</u></b> | <b><u>Independent Ethics Committee or Institutional Review Board Address(es)</u></b>                                                |
|---------------------------------|-------------------------------------------------------------------------------------------------------------------------------------|
| 1104                            | Clinical Research Ethics Committee of the Cork Teaching Hospitals<br>6 Little Hanover Street, Lancaster Hall<br>Cork<br>IRELAND     |
| 1141                            | The Clinical Research Ethics Committee of the Cork Teaching Hospitals<br>6 Little Hanover Street, Lancaster Hall<br>Cork<br>IRELAND |
| 1247                            | Clinical Research Ethics Committee of the Cork Teaching Hospitals<br>6 Little Hanover Street, Lancaster Hall<br>Cork<br>IRELAND     |
| 1248                            | Clinical Research Ethics Committee of the Cork Teaching Hospitals<br>6 Little Hanover Street, Lancaster Hall<br>Cork<br>IRELAND     |

## ITALY

| <b><u>Study Site Number</u></b> | <b><u>Independent Ethics Committee or Institutional Review Board Address(es)</u></b>                                                                                                                                                         |
|---------------------------------|----------------------------------------------------------------------------------------------------------------------------------------------------------------------------------------------------------------------------------------------|
| 1050                            | Comitato Etico dell'Azienda USL Frosinone<br>Via Armando Fabi<br>Frosinone, 03100<br>ITALY                                                                                                                                                   |
| 1060                            | Comitato Etico<br>Via Ripamonti, 435, Istituto Europeo Oncologico<br>Milano, 20141<br>ITALY                                                                                                                                                  |
| 1120                            | Ethics Committee of the Area Vasta Nord Ovest Autonomous<br>Section of the Regional Ethic Committee for Clinical Investigation<br>Via Roma 67<br>Pisa, 56126<br>ITALY<br><br>Comitato Etico<br>Via Elio Chianesi, 53<br>Roma, 00144<br>ITALY |
| 1189                            | CEROM (Comitato Etico della Romagna)<br>Via Moroncelli<br>Meldola, FORLI 47014<br>ITALY                                                                                                                                                      |
| 1191                            | Comitato Etico Campania Nord c/o A.O Azienda Ospedaliera San Giuseppe Moscati di Avellino<br>Contrada Amoretta Citta' Ospedaliera<br>Avellino, 83100<br>ITALY                                                                                |
| 1264                            | Comitato Etico<br>Via Elio Chianesi, 53<br>Roma, 00128<br>ITALY                                                                                                                                                                              |

**Study Site Number**

1265

**Independent Ethics Committee or Institutional Review Board Address(es)**

Comitato Etico Indipendente  
Universitaria di Bologna Policlinico S. Orsola Malpighi  
dell'Azienda Ospedaliero, Via Albertoni, 15  
Bologna, BO 40138  
ITALY

1298

Comitato Etico Per Le Attivita' Biomediche "Carlo Romano"  
via Sergio Pansini 5 Comitato Etico Per Le Attivita' Biomediche "Carlo Romano", Universita' Degli Studi Di Napoli "Federico II"  
Naples, 80131  
ITALY

## JAPAN

| <b><u>Study Site Number</u></b> | <b><u>Independent Ethics Committee or Institutional Review Board Address(es)</u></b>                                                      |
|---------------------------------|-------------------------------------------------------------------------------------------------------------------------------------------|
| 1323                            | Aichi Cancer Center Hospital IRB<br>Kanokoden, Chikusa-ku, 1-1<br>Nagoya, AICHI 464-8681<br>JAPAN                                         |
| 1324                            | National Cancer Center Hospital IRB<br>Tsukiji, Chuo-ku,, 5-1-1<br>Tokyo, 104-0045<br>JAPAN                                               |
| 1325                            | National Cancer Center Hospital IRB<br>5-1-1 Tsukiji, Chuo-ku<br>Tokyo, 104-0045<br>JAPAN                                                 |
| 1326                            | National Hospital Organization Osaka National Hospital IRB<br>Hoenzaka, Chuo-ku, 2-1-14<br>Osaka, OSAKA 540-0006<br>JAPAN                 |
| 1327                            | Hakuaikai Medical Corporation Sagara Hospital Institutional Review Board<br>3-31, Matsubara-cho<br>Kagoshima, KAGOSHIMA 892-0833<br>JAPAN |
| 1328                            | Iwate Medical University IRB<br>19-1, Uchimarui<br>Morioka-shi, IWATE 020-8505<br>JAPAN                                                   |
| 1329                            | National Hospital Organization Shikoku Cancer Center IRB<br>160, Kou Minamiumemoto-machi<br>Matsuyama, EHIME 791-0280<br>JAPAN            |

| <b><u>Study Site Number</u></b> | <b><u>Independent Ethics Committee or Institutional Review Board Address(es)</u></b>                                                                            |
|---------------------------------|-----------------------------------------------------------------------------------------------------------------------------------------------------------------|
| 1330                            | National Hospital Organization Kyushu Cancer Center IRB<br>3-1-1,Notame, Minami-ku<br>Fukuoka, FUKUOKA 811-1395<br>JAPAN                                        |
| 1331                            | National Hospital Organization Hokkaido Cancer Center Institutional Review Board<br>Kikusui, Shiroishi-ku, 4-2-3-54<br>Sapporo-city, HOKKAIDO 003-0804<br>JAPAN |
| 1332                            | Chiba Cancer Center IRB<br>Nitona-cho, Chuo-ku, 666-2<br>Chiba, CHIBA 260-8717<br>JAPAN                                                                         |
| 1333                            | Hiroshima City Hiroshima Citizens Hospital Institutional Review Board<br>Moto-machi, Naka-ku, 7-33<br>Hiroshima, HIROSHIMA 730-8518<br>JAPAN                    |
| 1334                            | Kumamoto University Hospital IRB<br>1-1-1, Honjo, Chuo-ku<br>Kumamoto-city, KUMAMOTO 860-8556<br>JAPAN                                                          |
| 1335                            | Saitama Cancer Center IRB<br>Komuro, Ina-cho, 780<br>Kita-adachi-gun, SAITAMA 362-0806<br>JAPAN                                                                 |
| 1337                            | Kumamoto City Hospital IRB<br>1-1-60 Koto, Higashi-ku<br>Kumamoto-city, KUMAMOTO 862-8505<br>JAPAN                                                              |
| 1340                            | Niigata Cancer Center Hospital Institutional Review Board<br>2-15-3 Kawagishi-cho, Chuo-Ku<br>Niigata, 951-8566<br>JAPAN                                        |

**KOREA, REPUBLIC OF**

| <b><u>Study Site Number</u></b> | <b><u>Independent Ethics Committee or Institutional Review Board Address(es)</u></b>                                                                                                            |
|---------------------------------|-------------------------------------------------------------------------------------------------------------------------------------------------------------------------------------------------|
| 1172                            | Samsung Medical Center IRB<br>Samsung Medical Center<br>81 Irwon-ro, Gangnam-gu<br>Seoul, 06351<br>KOREA, REPUBLIC OF                                                                           |
| 1173                            | Seoul National University Hospital Institutional Review Board<br>101, Daehak-ro, Jongno-gu, Seoul National University Hospital Institutional Review Board<br>Seoul, 03080<br>KOREA, REPUBLIC OF |
| 1174                            | Asan Medical Center IRB<br>Asan Medical Center<br>88, Olympic-ro, 43-Gil, Songpa-Gu<br>Seoul, 05505<br>KOREA, REPUBLIC OF                                                                       |
| 1175                            | Seoul National University Bundang Hospital IRB<br>82, Gumi-ro 173beon-gil, Bundang-gu<br>Seongnam-si, GYEONGGI-DO 13620<br>KOREA, REPUBLIC OF                                                   |
| 1177                            | National Cancer Center, Institutional Review Board<br>323 Ilsan-ro, Ilsandong-gu<br>Goyang-si, GYEONGGI-DO 10408<br>KOREA, REPUBLIC OF                                                          |
| 1179                            | Severance Hospital, IRB, Human Research Protection Center<br>50 Yonsei-ro, Seodaemun-gu, Severance Hospital, Yonsei University Health System<br>Seoul, 03722<br>KOREA, REPUBLIC OF              |

**NEW ZEALAND**

**Study Site Number**

1169

**Independent Ethics Committee or Institutional Review Board Address(es)**

Health and Disability Ethics Committee (HDEC)  
No 1 The Terrace, Ministry of Health  
Wellington, PO Box 5013  
NEW ZEALAND



**NO SCA COUNTRY SPECIFIED**

**Study Site Number**

1103

**Independent Ethics Committee or Institutional Review Board Address(es)**

Clinical Research Ethics Committee of the Cork Teaching Hospitals  
6 Little Hanover Street, Lancaster Hall  
Cork  
IRELAND

**POLAND**

| <b><u>Study Site Number</u></b> | <b><u>Independent Ethics Committee or Institutional Review Board Address(es)</u></b>                                                                            |
|---------------------------------|-----------------------------------------------------------------------------------------------------------------------------------------------------------------|
| 1052                            | Niezależna Komisja Bioetyczna ds. Badan Naukowych przy Gdanskim Uniwersytecie Medycznym (GUMed),<br>M. Sklodowskiej - Curie 3a, Str<br>Gdansk, 80-210<br>POLAND |
| 1053                            | Niezależna Komisja Bioetyczna do Spraw Badan Naukowych przy GUMed<br>M. Sklodowskiej Curie 3A, Str.<br>Gdansk, 80-211<br>POLAND                                 |
| 1099                            | Niezależna Komisja Bioetyczna do Spraw Badan Naukowych przy GUMed<br>M. Sklodowskiej - Curie 3a<br>Gdansk, 80-211<br>POLAND                                     |
| 1245                            | Niezależna Komisja Bioetyczna do Spraw Badan Naukowych przy GUMed<br>M. Sklodowskiej - Curie 3a<br>Gdansk, 80-211<br>POLAND                                     |

## **RUSSIAN FEDERATION**

| <b><u>Study Site Number</u></b> | <b><u>Independent Ethics Committee or Institutional Review Board Address(es)</u></b>                                                                                                                                                                                                                                    |
|---------------------------------|-------------------------------------------------------------------------------------------------------------------------------------------------------------------------------------------------------------------------------------------------------------------------------------------------------------------------|
| 1051                            | Local Ethics Committee<br>Kursk Regional Clinical Oncology Dispensary<br>20, ul Pirogova, Healthcare Committee of Kursk Region<br>Kursk, 305035<br>RUSSIAN FEDERATION<br><br>Ethics Council under the Ministry of Health of the Russian Federation<br>3, Rakhmanovskiy pereulok<br>Moscow, 127994<br>RUSSIAN FEDERATION |
| 1055                            | LEC of State Budget Healthcare Institution<br>37-39 Liteiny prospect, "Leningrad Region Oncology Dispensary"<br>Saint-Petersburg, 191014<br>RUSSIAN FEDERATION<br><br>Ethics Council under the Ministry of Health of the Russian Federation<br>3, Rakhmanovskiy pereulok<br>Moscow, 127994<br>RUSSIAN FEDERATION        |
| 1056                            | Ethics Council at the Ministry of Health of the Russian Federation<br>3, Rakhmanovskiy pereulok<br>Moscow, 127994<br>RUSSIAN FEDERATION<br><br>LEC of SBMI Republican Clinical Oncology Dispensary under the Ministry of health Care of RB<br>73/1. Oktyabrya pr.<br>Ufa, RUSSIA 450054<br>RUSSIAN FEDERATION           |
| 1058                            | LEC of Saint-Petersburg State Budget Healthcare Institution (SBHCI)<br>City Clinical Oncology Dispensary<br>56, Veteranov prospect<br>Saint-Petersburg, 197022<br>RUSSIAN FEDERATION                                                                                                                                    |

| <b><u>Study Site Number</u></b> | <b><u>Independent Ethics Committee or Institutional Review Board Address(es)</u></b>                                                                                     |
|---------------------------------|--------------------------------------------------------------------------------------------------------------------------------------------------------------------------|
|                                 | Ethics Council of the Ministry of Health of the Russian Federation<br>3 Rakhmanovsky pereulok<br>Moscow, 127994<br>RUSSIAN FEDERATION                                    |
| 1059                            | LEC of State Budget institution of Healthcare Omsk Regional Clinical Oncology Dispensary<br>9/1, Zavertyaeva, Str.<br>Omsk, 644013<br>RUSSIAN FEDERATION                 |
|                                 | Ethics Council of the Ministry of Health of the Russian Federation<br>3 Rakhmanovsky pereulok<br>Moscow, 127994<br>RUSSIAN FEDERATION                                    |
| 1124                            | Local Ethical Committee<br>State Medicoprophylactic Institution 'Chelyabinsk Regional Oncology Center'<br>42, Blukhera str.<br>Chelyabinsk, 454076<br>RUSSIAN FEDERATION |
|                                 | Ethics Council of the Ministry of Health of the Russian Federation<br>3 Rakhmanovsky pereulok<br>Moscow, 127994<br>RUSSIAN FEDERATION                                    |
| 1216                            | Ethics Committee of N.N.Blokhin Cancer Research Center RAMS<br>N.N.Blokhin Cancer Research Center RAMS<br>24, Kashirskoye sh.<br>Moscow, 115478<br>RUSSIAN FEDERATION    |
|                                 | Ethics Council of the Ministry of Health of the Russian Federation<br>3 Rakhmanovsky pereulok<br>Moscow, 127994<br>RUSSIAN FEDERATION                                    |

| <b><u>Study Site Number</u></b> | <b><u>Independent Ethics Committee or Institutional Review Board Address(es)</u></b>                                                                                                                                                                                                                                                                                                         |
|---------------------------------|----------------------------------------------------------------------------------------------------------------------------------------------------------------------------------------------------------------------------------------------------------------------------------------------------------------------------------------------------------------------------------------------|
| 1286                            | <p>LEC based on Non-State HealthCare agency "Road Clinical Hospital of PLC" Russian Railways"<br/> 27, prospect Mechnikova Non-State Institution of Healthcare, RZHD OJSC RR<br/> St. Petersburg, 195271<br/> RUSSIAN FEDERATION</p> <p>Ethics Council under the Ministry of Health of the Russian Federation<br/> 3, Rakhmanovskiy pereulok<br/> Moscow, 127994<br/> RUSSIAN FEDERATION</p> |
| 1287                            | <p>Expert Board/Ethics Committee of Republic<br/> Clinical Oncology Dispensary of Ministry of Health of Republic of Tatarstan<br/> 29, Sibirsky trakt<br/> Kazan, 420029<br/> RUSSIAN FEDERATION</p> <p>Ethics Council of the Ministry of Health of the Russian Federation<br/> 3 Rakhmanovsky pereulok<br/> Moscow, 127994<br/> RUSSIAN FEDERATION</p>                                      |
| 1297                            | <p>Ethics Committee of State Educational Institution of Higher Professional Education Ryazan State<br/> Medical University I.P. Pavlov, 9, Vysokovoltnaya ulitsa<br/> Ryazan, 390026<br/> RUSSIAN FEDERATION</p> <p>Ethics Council at the Ministry of Health of the Russian Federation<br/> 3, Rakhmanovskij pereulok<br/> Moscow, 127994<br/> RUSSIAN FEDERATION</p>                        |
| 1308                            | <p>EC of SAHI of Moscow "Moscow City Oncology Hospital #62 of Health Department of Moscow"<br/> Moscow Healthcare Department<br/> Settlement Istra 27 bld 1-26, Krasnogorskiy District<br/> Moscow area, 143423<br/> RUSSIAN FEDERATION</p>                                                                                                                                                  |

**Study Site Number**

**Independent Ethics Committee or Institutional Review Board Address(es)**

Ethics Council of the Ministry of Health of the Russian Federation  
3 Rakhmanovsky pereulok  
Moscow, 127994  
RUSSIAN FEDERATION

**SPAIN**

| <b><u>Study Site Number</u></b> | <b><u>Independent Ethics Committee or Institutional Review Board Address(es)</u></b>                                                                                                                                                                                                                                                                                                                    |
|---------------------------------|---------------------------------------------------------------------------------------------------------------------------------------------------------------------------------------------------------------------------------------------------------------------------------------------------------------------------------------------------------------------------------------------------------|
| 1079                            | Comite etico de investigacion clinica<br>C/Feixa Llarga, s/nHospital universitario de Bellvitge, L'Hospitalet del Llobregat, secretaria administrativa del CEIC. Edifici de recerca<br>Barcelona, 08907<br>SPAIN                                                                                                                                                                                        |
| 1080                            | Comite Etico de Investigación Clínica. Hospital Universitari de Bellvitge<br>Secretaría Administrativa del CEIC,Edifici Unitat de Recerca.<br>L'Hospitalet de Llobregat, C/ Feixa Llarga, s/n<br>Barcelona, 08907<br>SPAIN                                                                                                                                                                              |
| 1081                            | Comite Etico de Investigacion Clinica, Hospital Universitario de Bellvitge<br>Secretaria Administrativa del CEIC, Edifici Unitat de Recerca<br>C/ Feixa Llarga, s/n<br>L'Hospitalet de Llobregat, BARCELONA 08907<br>SPAIN                                                                                                                                                                              |
| 1082                            | Comite Etico de Investigacion Clinica, Hospital Universitario de Bellvitge<br>Secretaria Administrativa del CEIC, Edifici Unitat de Recerca<br>C/ Feixa Llarga, s/n<br>L'Hospitalet de Llobregat, BARCELONA 08907<br>SPAIN<br><br>Comite Etico de Investigacion Clinica de Las Islas Baleares<br>Camino de Jesus, 38, Conselleria de Salut i Consum<br>Palma de Mallorca, ISLAS BALEARES 07011<br>SPAIN |
| 1083                            | Comite Etico de Investigación Clínica. Hospital Universitari de Bellvitge<br>Secretaría Administrativa del CEIC,Edifici Unitat de Recerca.<br>L'Hospitalet de Llobregat, C/ Feixa Llarga, s/n<br>Barcelona, 08907<br>SPAIN                                                                                                                                                                              |

| <b><u>Study Site Number</u></b> | <b><u>Independent Ethics Committee or Institutional Review Board Address(es)</u></b>                                                                                                                                       |
|---------------------------------|----------------------------------------------------------------------------------------------------------------------------------------------------------------------------------------------------------------------------|
| 1084                            | Comite Etico de Investigacion Clinica, Hospital Universitario de Bellvitge<br>Secretaria Administrativa del CEIC, Edifici Unitat de Recerca<br>C/ Feixa Llarga, s/n<br>L'Hospitalet de Llobregat, BARCELONA 08907<br>SPAIN |
| 1085                            | Comite Etico de Investigacion Clinica, Hospital Universitario de Bellvitge<br>Secretaria Administrativa del CEIC, Edifici Unitat de Recerca<br>C/ Feixa Llarga, s/n<br>L'Hospitalet de Llobregat, BARCELONA 08907<br>SPAIN |
| 1086                            | Comite Etico de Investigacion Clinica, Hospital Universitario de Bellvitge<br>Secretaria Administrativa del CEIC, Edifici Unitat de Recerca<br>C/ Feixa Llarga, s/n<br>L'Hospitalet de Llobregat, BARCELONA 08907<br>SPAIN |
| 1087                            | Comite Etico de Investigacion Clinica, Hospital Universitario de Bellvitge<br>Secretaria Administrativa del CEIC, Edifici Unitat de Recerca<br>C/ Feixa Llarga, s/n<br>L'Hospitalet de Llobregat, BARCELONA 08907<br>SPAIN |
| 1088                            | Comite etico de investigacion clinica<br>C/Feixa Llarga, s/nHospital universitario de Bellvitge, L'Hospitalet del Llobregat, secretaria administrativa del CEIC. Edifici de recerca<br>Barcelona, 08907<br>SPAIN           |
| 1089                            | Comite Etico de Investigacion Clinica, Hospital Universitario de Bellvitge<br>Secretaria Administrativa del CEIC, Edifici Unitat de Recerca<br>C/ Feixa Llarga, s/n<br>L'Hospitalet de Llobregat, BARCELONA 08907<br>SPAIN |



| <b><u>Study Site Number</u></b> | <b><u>Independent Ethics Committee or Institutional Review Board Address(es)</u></b>                                                                                                                                        |
|---------------------------------|-----------------------------------------------------------------------------------------------------------------------------------------------------------------------------------------------------------------------------|
| 1090                            | Comite etico de investigacion clinica<br>Edifici Unitat de recerca<br>secretaria administrativa del CEIC.C/Feixa Llarga, s/n, Hospital universitario de Bellvitge L'Hospitalet del Llobregat<br>Barcelona, 08907<br>SPAIN   |
| 1091                            | Comite etico de investigacion clinica<br>C/Feixa Llarga, s/nHospital universitario de Bellvitge, L'Hospitalet del Llobregat, secretaria administrativa del CEIC. Edifici de recerca<br>Barcelona, 08907<br>SPAIN            |
| 1092                            | Comite Etico de Investigacion Clinica<br>Secretaria Administrativa del CEIC, Edifici Unitat de Recerca<br>Hospital Universitario de Bellvitge, C/ Feixa Llarga, s/n<br>L'Hospitalet de Llobregat, BARCELONA 08907<br>SPAIN  |
| 1105                            | Comite Etico de Investigacion Clinica<br>Secretaría Administrativa del CEIC, Edifici Unitat de Recerca.<br>Hospital Universitario de Bellvitge, L'Hospitalet de Llobregat, C/Feixa Llarga, s/n<br>Barcelona, 08907<br>SPAIN |
| 1106                            | Comite Etico de Investigacion Clinica<br>Secretaría Administrativa del CEIC, Edifici Unitat de Recerca.<br>Hospital Universitario de Bellvitge, L'Hospitalet de Llobregat, C/Feixa Llarga, s/n<br>Barcelona, 08907<br>SPAIN |
| 1107                            | Comite Etico de Investigacion Clinica<br>Secretaría Administrativa del CEIC, Edifici Unitat de Recerca.<br>Hospital Universitario de Bellvitge, L'Hospitalet de Llobregat, C/Feixa Llarga, s/n<br>Barcelona, 08907<br>SPAIN |

| <b><u>Study Site Number</u></b> | <b><u>Independent Ethics Committee or Institutional Review Board Address(es)</u></b>                                                                                                                                                                                                                                                                                                                    |
|---------------------------------|---------------------------------------------------------------------------------------------------------------------------------------------------------------------------------------------------------------------------------------------------------------------------------------------------------------------------------------------------------------------------------------------------------|
| 1116                            | Comite Etico de Investigacion Clinica<br>Secretaría Administrativa del CEIC, Edifici Unitat de Recerca.<br>Hospital Universitario de Bellvitge, L'Hospitalet de Llobregat, C/Feixa Llarga, s/n<br>Barcelona, 08907<br>SPAIN                                                                                                                                                                             |
| 1117                            | Comite Etico de Investigacion Clinica<br>Secretaría Administrativa del CEIC, Edifici Unitat de Recerca.<br>Hospital Universitario de Bellvitge, L'Hospitalet de Llobregat, C/Feixa Llarga, s/n<br>Barcelona, 08907<br>SPAIN                                                                                                                                                                             |
| 1146                            | Hospital Fundación de Alcorcón<br>C/ Budapest 1 - Planta Sótano Comité Ético de Investigación Clínica - Área 8, Fundación Hospital Alcorcón<br>Madrid, ALCORCÓN 28922<br>SPAIN<br><br>Comite etico de investigacion clinica<br>C/Feixa Llarga, s/n Hospital universitario de Bellvitge, L'Hospitalet del Llobregat, secretaria administrativa del CEIC. Edifici de recerca<br>Barcelona, 08907<br>SPAIN |
| 1147                            | Comite etico de investigacion clinica<br>C/Feixa Llarga, s/n Hospital universitario de Bellvitge, L'Hospitalet de Llobregat, secretaria administrativa del CEIC. Edifici de recerca<br>Barcelona, 08907<br>SPAIN                                                                                                                                                                                        |
| 1149                            | Comite Etico de Investigacion Clinica<br>Secretaría Administrativa del CEIC, Edifici Unitat de Recerca.<br>Hospital Universitario de Bellvitge, L'Hospitalet de Llobregat, C/Feixa Llarga, s/n<br>Barcelona, 08907<br>SPAIN                                                                                                                                                                             |

**TAIWAN**

| <b><u>Study Site Number</u></b> | <b><u>Independent Ethics Committee or Institutional Review Board Address(es)</u></b>                                                                                                                |
|---------------------------------|-----------------------------------------------------------------------------------------------------------------------------------------------------------------------------------------------------|
| 1260                            | Institutional Review Board, Koo Foundation Sun Yat-Sen Cancer Center<br>No.125, Lih-Der Road, Taiwan R.O.C<br>Bei-Tou District, TAIPEI 11259<br>TAIWAN                                              |
| 1261                            | Institutional Review Board, Taipei Veterans General Hospital<br>No.201, Sec. 2, Shipai Rd, Beitou District<br>Taipei, 11217<br>TAIWAN                                                               |
| 1266                            | Mackay Memory Hospital Institutional Review Board<br>No. 92, Section 2, Zhongshan North RoadMACKAY MEMORIAL HOSPITAL Institutional Review Board, Zhongshan District, 8 F<br>Taipei, 10449<br>TAIWAN |
| 1311                            | National Taiwan University Hospital, Research Ethics Committee<br>Changde St., Zhongzheng Dist., No.1<br>Taipei City, 10002<br>TAIWAN                                                               |

## UKRAINE

| <b><u>Study Site Number</u></b> | <b><u>Independent Ethics Committee or Institutional Review Board Address(es)</u></b>                                                                                                                                                  |
|---------------------------------|---------------------------------------------------------------------------------------------------------------------------------------------------------------------------------------------------------------------------------------|
| 1143                            | Ethics Committee of the MI<br>31, Blyzhnya Str., Dnipropetrovsk City Multidisciplinary Clinical Hospital No. 4 of the Dnipropetrovsk City Council<br>Dnipro, 49102<br>UKRAINE                                                         |
| 1185                            | Local Ethic Committee of Lviv State<br>Oncologic Regional Treatment and Diagnostic Center<br>2A, Ja. Gashek St.<br>Lviv, 79031<br>UKRAINE                                                                                             |
| 1186                            | Local Committee of Ethic Issues of Municipal Institution<br>Local Committee of Ethic Issues of Municipal Institution Zaporizhzhia Regional Clinical Oncology<br>177a, Kultuma Str., Dispensary" ZRA<br>Zaporizhzhia, 69040<br>UKRAINE |
| 1295                            | Local Ethic Committee of Uzhgorod of Central Municipal Clinical Hospital<br>20, Hryboyedova Str.<br>Uzhgorod, N/A 88000<br>UKRAINE                                                                                                    |
| 1300                            | Local Ethic Committee of MMI "Makiivka City Hospital No.2 of Donetsk Region"<br>12 Ferhanska str<br>Makiivka, N/A 86120<br>UKRAINE                                                                                                    |
| 1301                            | Commission of Ethic Issues of Municipal Non-Profit Enterprise "Regional Centre of Oncology"<br>4, Lisoparkivs'ka Str.<br>Kharkiv, 61070<br>UKRAINE                                                                                    |
| 1304                            | Local Committee of Ethic Issues of Regional Municipal Establishment<br>Sumy Regional Clinical Oncology Dispensary<br>31, Pryvokzalna Str.<br>Sumy, 40005<br>UKRAINE                                                                   |

**UNITED KINGDOM**

| <b><u>Study Site Number</u></b> | <b><u>Independent Ethics Committee or Institutional Review Board Address(es)</u></b>                                                                                                               |
|---------------------------------|----------------------------------------------------------------------------------------------------------------------------------------------------------------------------------------------------|
| 1171                            | South East Coast-Brighton and Sussex REC<br>80 London Road, Ground Floor, Skipton House<br>London, SE1 6LH<br>UNITED KINGDOM                                                                       |
| 1249                            | South East Coast- Brighton and Sussex REC<br>80 London Road Ground Floor, Skipton house<br>London, SE1 6LH<br>UNITED KINGDOM                                                                       |
| 1250                            | NRES Committee south East Coast-Brighton and Sussex health Research Authority<br>80 London Road, Ground Floor Skipton House<br>London, SE1 6LH<br>UNITED KINGDOM                                   |
| 1251                            | South East Coast- Brighton and Sussex REC<br>80 London Road Ground Floor, Skipton house<br>London, SE1 6LH<br>UNITED KINGDOM                                                                       |
| 1271                            | NRES Committee London - Central<br>80 London RoadNRES Committee South East Coast - Brighton and Sussex Health Research Authority, Ground Floor, Skipton House<br>London, SE1 6LH<br>UNITED KINGDOM |
| 1310                            | South East Coast- Brighton and Sussex REC<br>80 London Road Ground Floor, Skipton house<br>London, SE1 6LH<br>UNITED KINGDOM                                                                       |
| 1320                            | South East Coast- Brighton and Sussex REC<br>80 London Road Ground Floor, Skipton house<br>London, SE1 6LH<br>UNITED KINGDOM                                                                       |

**UNITED STATES**

| <b><u>Study Site Number</u></b> | <b><u>Independent Ethics Committee or Institutional Review Board Address(es)</u></b>                                                                                                                          |
|---------------------------------|---------------------------------------------------------------------------------------------------------------------------------------------------------------------------------------------------------------|
| 1001                            | Western Institutional Review Board<br>1019 39th Ave SE, Ste 120<br>Puyallup, WA 98374-2115<br>UNITED STATES                                                                                                   |
| 1003                            | Western Institutional Review Board<br>1019 39th Ave SE, Ste 120<br>Puyallup, WA 98374-2115<br>UNITED STATES                                                                                                   |
| 1004                            | Sparrow Institution Research Review Committee Office of Research Oversight and Compliance<br>Sparrow Institutional Review Board, 1215 E Michigan Ave. PO Box 30480<br>Lansing, MI 48090-7890<br>UNITED STATES |
| 1005                            | Western Institutional Review Board<br>1019 39th Ave SE, Ste 120<br>Puyallup, WA 98374-2115<br>UNITED STATES                                                                                                   |
| 1006                            | Western Institutional Review Board<br>1019 39th Ave SE, Ste 120<br>Puyallup, WA 98374-2115<br>UNITED STATES                                                                                                   |
| 1007                            | Western Institutional Review Board<br>1019 39th Ave SE, Ste 120<br>Puyallup, WA 98374-2115<br>UNITED STATES                                                                                                   |
| 1008                            | Western Institutional Review Board<br>1019 39th Ave SE, Ste 120<br>Puyallup, WA 98374-2115<br>UNITED STATES                                                                                                   |

| <b><u>Study Site Number</u></b> | <b><u>Independent Ethics Committee or Institutional Review Board Address(es)</u></b>                                                                     |
|---------------------------------|----------------------------------------------------------------------------------------------------------------------------------------------------------|
| 1009                            | UCLA - Office of the Human Research Protection Program<br>10889 Wilshire Blvd., Ste. 830<br>Los Angeles, CA 90024<br>UNITED STATES                       |
| 1010                            | Western Institutional Review Board<br>1019 39th Ave SE, Ste 120<br>Puyallup, WA 98374-2115<br>UNITED STATES                                              |
| 1011                            | OHSU Institutional Review Board<br>3181 Sw Sam Jackson Park Rd, L106-RI<br>Portland, OR 97239<br>UNITED STATES                                           |
| 1012                            | Western Institutional Review Board<br>1019 39th Ave SE, Ste 120<br>Puyallup, WA 98374-2115<br>UNITED STATES                                              |
| 1013                            | Western Institutional Review Board<br>1019 39th Ave SE, Ste 120<br>Puyallup, WA 98374-2115<br>UNITED STATES                                              |
| 1014                            | Western Institutional Review Board<br>1019 39th Ave SE, Ste 120<br>Puyallup, WA 98374-2115<br>UNITED STATES                                              |
| 1017                            | US Oncology Incorporated<br>10101 Woodloch Forest Dr, Institutional Review Board<br>The Woodlands, TX 77380<br>UNITED STATES                             |
| 1019                            | Kaiser Permanente Northwest Institutional Review Board<br>3800 N Interstate Ave, Research Subjects Protection Ofc<br>Portland, OR 97227<br>UNITED STATES |

| <b><u>Study Site Number</u></b> | <b><u>Independent Ethics Committee or Institutional Review Board Address(es)</u></b>                                                 |
|---------------------------------|--------------------------------------------------------------------------------------------------------------------------------------|
| 1020                            | Western Institutional Review Board<br>1019 39TH AVE SE<br>PUYALLUP, WA 98374<br>UNITED STATES                                        |
| 1023                            | University of Miami Institutional Review Board<br>1400 NW 10th Ave, Ste 1200A<br>Miami, FL 33136<br>UNITED STATES                    |
| 1024                            | Western Institutional Review Board<br>1019 39th Ave SE, Ste 120<br>Puyallup, WA 98374-2115<br>UNITED STATES                          |
| 1025                            | Western Institutional Review Board<br>1019 39th Ave SE, Ste 120<br>Puyallup, WA 98374-2115<br>UNITED STATES                          |
| 1026                            | Columbia University Medical Center Institutional Review Board<br>154 Haven Ave, First Fl<br>New York, NY 10032<br>UNITED STATES      |
| 1028                            | Human Subject Protection Program Office (HSPPO)<br>MedCenter One<br>501 E Broadway, Ste 200<br>Louisville, KY 40202<br>UNITED STATES |
| 1029                            | Western Institutional Review Board<br>1019 39th Ave SE, Ste 120<br>Puyallup, WA 98374-2115<br>UNITED STATES                          |



| <b><u>Study Site Number</u></b> | <b><u>Independent Ethics Committee or Institutional Review Board Address(es)</u></b>                                                                                                                 |
|---------------------------------|------------------------------------------------------------------------------------------------------------------------------------------------------------------------------------------------------|
| 1030                            | West Virginia University Institutional Review Board<br>Chestnut Ridge Research Bldg, 866 Chestnut Ridge Rd, PO Box 6845<br>Morgantown, WV 26506<br>UNITED STATES                                     |
| 1031                            | University of Southern California Health Science Campus Institutional Review Board<br>LAC/USC Medical Center<br>1200 N State St, General Hospital Ste 4700<br>Los Angeles, CA 90033<br>UNITED STATES |
| 1032                            | Western Institutional Review Board<br>1019 39th Ave SE, Ste 120<br>Puyallup, WA 98374-2115<br>UNITED STATES                                                                                          |
| 1033                            | Western Institutional Review Board<br>1019 39th Ave SE, Ste 120<br>Puyallup, WA 98374-2115<br>UNITED STATES                                                                                          |
| 1035                            | Mercy Hospital St. Louis Institutional Review Board<br>621 S. New Ballas Rd., Ste 6002B<br>St. Louis, MO 63141<br>UNITED STATES                                                                      |
| 1040                            | Western Institutional Review Board<br>1019 39th Ave SE, Ste 120<br>Puyallup, WA 98374-2115<br>UNITED STATES                                                                                          |
| 1078                            | UCSF IRB<br>3333 California St, Ste 315<br>San Francisco, CA 94118<br>UNITED STATES                                                                                                                  |

| <b><u>Study Site Number</u></b> | <b><u>Independent Ethics Committee or Institutional Review Board Address(es)</u></b>                                         |
|---------------------------------|------------------------------------------------------------------------------------------------------------------------------|
| 1109                            | US Oncology Incorporated<br>10101 Woodloch Forest Dr, Institutional Review Board<br>The Woodlands, TX 77380<br>UNITED STATES |
| 1110                            | US Oncology Incorporated<br>10101 Woodloch Forest Dr, Institutional Review Board<br>The Woodlands, TX 77380<br>UNITED STATES |
| 1111                            | Chesapeake IRB<br>6940 Columbia Gateway Dr<br>Columbia, MD 21046-3403<br>UNITED STATES                                       |
| 1112                            | US Oncology Incorporated<br>10101 Woodloch Forest Dr, Institutional Review Board<br>The Woodlands, TX 77380<br>UNITED STATES |
| 1125                            | US Oncology Incorporated<br>10101 Woodloch Forest Dr, Institutional Review Board<br>The Woodlands, TX 77380<br>UNITED STATES |
| 1126                            | US Oncology Incorporated<br>10101 Woodloch Forest Dr, Institutional Review Board<br>The Woodlands, TX 77380<br>UNITED STATES |
| 1127                            | Western Institutional Review Board<br>1019 39th Ave SE, Ste 120<br>Puyallup, WA 98374-2115<br>UNITED STATES                  |
| 1128                            | US Oncology Incorporated<br>10101 Woodloch Forest Dr, Institutional Review Board<br>The Woodlands, TX 77380<br>UNITED STATES |

| <b><u>Study Site Number</u></b> | <b><u>Independent Ethics Committee or Institutional Review Board Address(es)</u></b>                                                                                       |
|---------------------------------|----------------------------------------------------------------------------------------------------------------------------------------------------------------------------|
| 1129                            | Yale University Institutional Review Board #2, 3, 4B, 5<br>150 Munson Street Human Investigation Committee I, II, III, IV, 3rd Fl<br>New Haven, CT 06520<br>UNITED STATES  |
| 1131                            | Western Institutional Review Board<br>1019 39th Ave SE, Ste 120<br>Puyallup, WA 98374-2115<br>UNITED STATES                                                                |
| 1132                            | US Oncology Incorporated<br>10101 Woodloch Forest Dr, Institutional Review Board<br>The Woodlands, TX 77380<br>UNITED STATES                                               |
| 1133                            | University of Michigan Review Board for Human Subject Research (IRBMED)<br>2800 Plymouth Rd<br>Ann Arbor, MI 48109<br>UNITED STATES                                        |
| 1134                            | Department of Research Programs, Walter Reed National Military Medical Center IRB<br>8901 Wiscosin Avenue Building 17, Rm 3055<br>Bethesda, MD 20889-5600<br>UNITED STATES |
| 1162                            | UT MD Anderson Cancer Center Institutional Review Board<br>7007 Bertner Ave., Unit 1637<br>Houston, TX 77030<br>UNITED STATES                                              |
| 1198                            | Western Institutional Review Board<br>1019 39th Ave SE, Ste 120<br>Puyallup, WA 98374-2115<br>UNITED STATES                                                                |
| 1201                            | Human Research Protections Office<br>UMB BioPark One University of Maryland School of Medicine, 800 W Baltimore St, Ste 100<br>Baltimore, MD 21201<br>UNITED STATES        |

| <b><u>Study Site Number</u></b> | <b><u>Independent Ethics Committee or Institutional Review Board Address(es)</u></b>                                               |
|---------------------------------|------------------------------------------------------------------------------------------------------------------------------------|
| 1203                            | US Oncology Incorporated<br>10101 Woodloch Forest Dr, Institutional Review Board<br>The Woodlands, TX 77380<br>UNITED STATES       |
| 1213                            | HealthPartners Institute Institutional Review Board<br>3311 E. Old Shakopee Rd.<br>Bloomington, MN 55425<br>UNITED STATES          |
| 1214                            | Western Institutional Review Board<br>1019 39th Ave SE, Ste 120<br>Puyallup, WA 98374-2115<br>UNITED STATES                        |
| 1230                            | Western Institutional Review Board<br>1019 39th Ave SE, Ste 120<br>Puyallup, WA 98374-2115<br>UNITED STATES                        |
| 1235                            | Kaiser Permanente Southern California Institutional Review Board<br>393 E Walnut St, 2nd Fl<br>Pasadena, CA 91188<br>UNITED STATES |
| 1246                            | Western Institutional Review Board<br>1019 39th Ave SE, Ste 120<br>Puyallup, WA 98374-2115<br>UNITED STATES                        |
| 1280                            | Western Institutional Review Board<br>1019 39th Ave SE, Ste 120<br>Puyallup, WA 98374-2115<br>UNITED STATES                        |
| 1281                            | Norwalk Hospital<br>34 Maple St, Institutional Review Board<br>Norwalk, CT 06856<br>UNITED STATES                                  |

| <b><u>Study Site Number</u></b> | <b><u>Independent Ethics Committee or Institutional Review Board Address(es)</u></b>                                                                                              |
|---------------------------------|-----------------------------------------------------------------------------------------------------------------------------------------------------------------------------------|
| 1315                            | US Oncology Incorporated<br>10101 Woodloch Forest Dr, Institutional Review Board<br>The Woodlands, TX 77380<br>UNITED STATES                                                      |
| 1316                            | MedStar Health Research Institute<br>Sw 104 Medical Dental Bldg, 3900 Reservoir Rd, Nw, Georgetown University Oncology Review Board<br>Washington, DC 20057-2197<br>UNITED STATES |
| 1350                            | Stanford Research Compliance Office<br>1501 S. California Ave.<br>Palo Alto, CA 94304<br>UNITED STATES                                                                            |
| 1358                            | Western Institutional Review Board<br>1019 39th Ave SE, Ste 120<br>Puyallup, WA 98374-2115<br>UNITED STATES                                                                       |
| 1359                            | Western Institutional Review Board<br>1019 39th Ave SE, Ste 120<br>Puyallup, WA 98374-2115<br>UNITED STATES                                                                       |
| 1362                            | Western Institutional Review Board<br>1019 39th Ave SE, Ste 120<br>Puyallup, WA 98374-2115<br>UNITED STATES                                                                       |
| 1364                            | Western Institutional Review Board<br>1019 39 th Ave Se, Ste 120<br>Puyallup, WA 98374<br>UNITED STATES                                                                           |
| 1365                            | Western Institutional Review Board<br>1019 39 th Ave Se, Ste 120<br>Puyallup, WA 98374<br>UNITED STATES                                                                           |

| <b><u>Study Site Number</u></b> | <b><u>Independent Ethics Committee or Institutional Review Board Address(es)</u></b>                        |
|---------------------------------|-------------------------------------------------------------------------------------------------------------|
| 1372                            | Western Institutional Review Board<br>1019 39th Ave SE, Ste 120<br>Puyallup, WA 98374<br>UNITED STATES      |
| 1373                            | Western Institutional Review Board<br>1019 39th Ave SE, Ste 120<br>Puyallup, WA 98374-2115<br>UNITED STATES |
| 1378                            | Western Institutional Review Board<br>1019 39th Ave., SE, Ste 120<br>Puyallup, WA 98374<br>UNITED STATES    |
| 1387                            | Western Institutional Review Board<br>1019 39 th Ave Se, Ste 120<br>Puyallup, WA 98374<br>UNITED STATES     |

**Figure S1.** CONSORT Diagram of PALOMA-2 study

<sup>a</sup>Patients who discontinued palbociclib or placebo could continue to receive letrozole alone

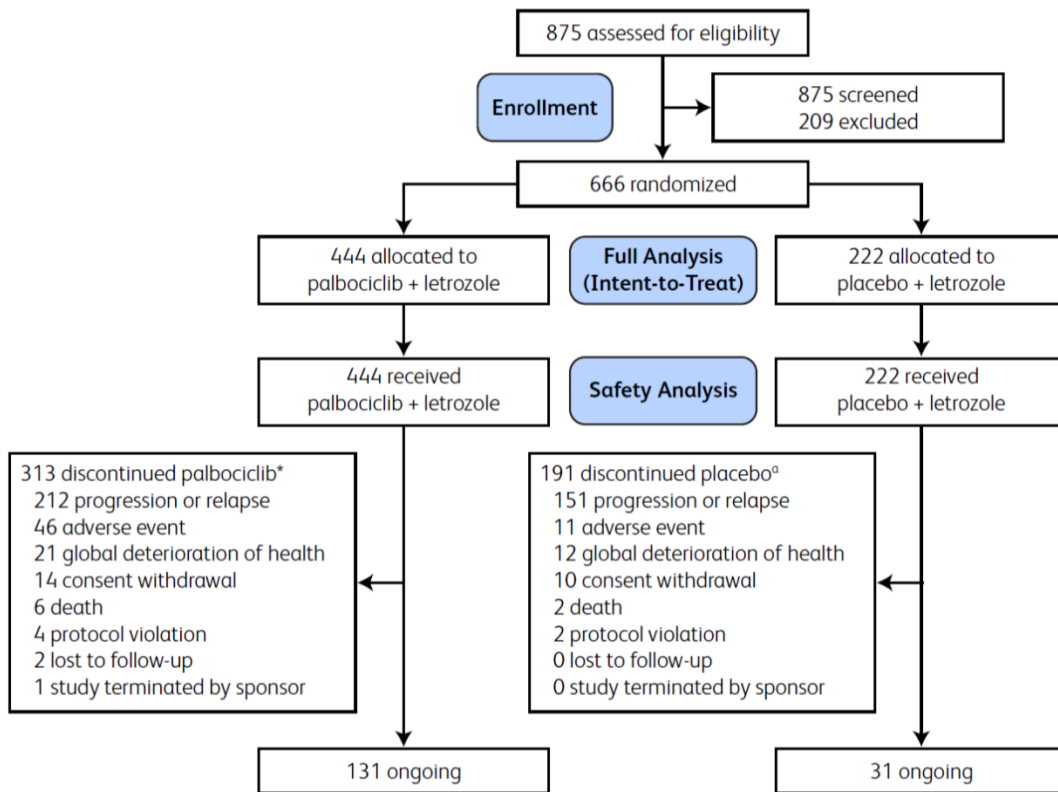

**Table S2.** Baseline demographic and disease characteristics (intent-to-treat population)

|                                       | <b>Palbociclib + Letrozole</b> | <b>Placebo + Letrozole</b> |
|---------------------------------------|--------------------------------|----------------------------|
|                                       | <b>(n=444)</b>                 | <b>(n=222)</b>             |
| Age, y                                |                                |                            |
| <65                                   | 263 (59.2)                     | 141 (63.5)                 |
| ≥65                                   | 181 (40.8)                     | 81 (36.5)                  |
| Median (range)                        | 62.0 (30–89)                   | 61.0 (28–88)               |
| Mean (SD)                             | 61.7 (10.6)                    | 60.6 (11.2)                |
| Race                                  |                                |                            |
| White                                 | 344 (77.5)                     | 172 (77.5)                 |
| Asian                                 | 65 (14.6)                      | 30 (13.5)                  |
| Black                                 | 8 (1.8)                        | 3 (1.4)                    |
| Other/missing                         | 27 (6.1)                       | 17 (7.7)                   |
| ECOG PS                               |                                |                            |
| 0                                     | 257 (57.9)                     | 102 (45.9)                 |
| 1                                     | 178 (40.1)                     | 117 (52.7)                 |
| 2                                     | 9 (2.0)                        | 2 (1.4)                    |
| Stage of disease at initial diagnosis |                                |                            |
| I–III                                 | 261 (58.8)                     | 137 (61.7)                 |
| IV                                    | 138 (31.1)                     | 72 (32.4)                  |
| Unknown, other, or missing            | 45 (10.1)                      | 13 (5.9)                   |
| Disease site                          |                                |                            |
| Visceral                              | 214 (48.2)                     | 110 (49.5)                 |
| Nonvisceral                           | 230 (51.8)                     | 112 (50.5)                 |
| Bone only                             | 103 (23.2)                     | 48 (21.6)                  |



---

|                                         |            |            |
|-----------------------------------------|------------|------------|
| Number of disease sites                 |            |            |
| 1                                       | 138 (31.1) | 66 (29.7)  |
| 2                                       | 117 (26.4) | 52 (23.4)  |
| 3                                       | 112 (25.2) | 61 (27.5)  |
| 4                                       | 51 (11.5)  | 28 (12.6)  |
| >4                                      | 26 (5.9)   | 15 (6.8)   |
| Recurrence type                         |            |            |
| Locoregional                            | 2 (0.5)    | 2 (0.9)    |
| Local                                   | 6 (1.4)    | 3 (1.4)    |
| Regional                                | 3 (0.7)    | 1 (0.5)    |
| Distant                                 | 294 (66.2) | 145 (65.3) |
| Newly diagnosed                         | 139 (31.3) | 71 (32.0)  |
| Treatment-free interval <sup>a</sup>    |            |            |
| De novo metastatic                      | 167 (37.6) | 81 (36.5)  |
| ≤12 mo                                  | 98 (22.1)  | 48 (21.6)  |
| >12 mo                                  | 179 (40.3) | 93 (41.9)  |
| Prior (neo)adjuvant therapies           |            |            |
| Chemotherapeutic                        | 213 (48.0) | 109 (49.1) |
| Neoadjuvant                             | 54 (12.2)  | 32 (14.4)  |
| Adjuvant                                | 180 (40.5) | 89 (40.1)  |
| Adjuvant endocrine therapy <sup>b</sup> | 250 (56.3) | 126 (56.8) |

---

**Abbreviations:** ECOG PS Eastern Cooperative Oncology Group performance status

Values are n (%) unless otherwise noted

<sup>a</sup> Defined as the time from (neo)adjuvant therapy to recurrence; percentage calculated based on number of patients who received (neo)adjuvant therapy

<sup>b</sup> Patients who progressed while on or within 12 months from completion of prior anastrozole or letrozole were excluded

**Table S3.** Exposure to palbociclib or placebo (as-treated population)<sup>a</sup>

|                                                                       | <b>Palbociclib + Letrozole</b> | <b>Placebo + Letrozole</b> |
|-----------------------------------------------------------------------|--------------------------------|----------------------------|
|                                                                       | <b>n=444</b>                   | <b>n=222</b>               |
| Number of cycles, n                                                   | 22.9 (14.6)                    | 18.7 (14.5)                |
| Duration of treatments, <sup>b</sup> months,                          |                                |                            |
| Mean                                                                  | 21.9 (14.1)                    | 17.0 (13.4)                |
| Median                                                                | 20.1 (0.03–49.0)               | 13.6 (0.33–50.4)           |
| Average daily dose administered, <sup>c</sup> mg                      |                                |                            |
| Mean                                                                  | 115.9 (13.9)                   | 124.8 (2.1)                |
| Median                                                                | 125.0 (76.0–125.2)             | 125.0 (104.7–125.6)        |
| Relative dose, <sup>d</sup> %                                         |                                |                            |
| Mean                                                                  | 90.3 (12.6)                    | 99.0 (3.7)                 |
| Median                                                                | 97.7 (57.2–109.5)              | 100.0 (69.0–102.4)         |
| Patients with ≥1 dose reduction, <sup>e</sup> n (%)                   | 175 (39.4)                     | 4 (1.8)                    |
| Patients with a dose interruption, <sup>f</sup> n (%)                 | 309 (69.6)                     | 97 (43.7)                  |
| Number of interruptions per patient, n                                | 2.0 (1.0–35.0)                 | 2.0 (1.0–15.0)             |
| Average duration of dose interruption, <sup>g</sup> days/interruption | 4.0 (1.0–16.0)                 | 1.0 (1.0–16.0)             |
| Patients with cycle delays, <sup>h</sup> n (%)                        | 315 (70.9)                     | 70 (31.5)                  |
| Average duration of cycle delay, days                                 | 5 (1.0–82.0)                   | 4.0 (1.0–33.0)             |

<sup>a</sup> Data represent the mean (standard deviation) or the median

(minimum–maximum), unless otherwise indicated

<sup>b</sup> Duration of treatments is defined as the total number of dosing days from first to and including last day of each study treatment

<sup>c</sup> Average daily dose administered = (total dose administered)/(total days on drug)

<sup>d</sup> Relative dose = [(actual total dose)/(intended total dose)]\*100%

<sup>e</sup> Dose reduction is any dose reduction from the initial prescribed dose, regardless of its duration; dose interruptions are not counted as reduction

- <sup>f</sup> Interruptions include missed dose collected on the case report form and dose with 0 mg administered
- <sup>g</sup> Average duration of dose interruptions/cycle delays is the sum of interruption/cycle delay duration divided by the total number of interruptions/delays
- <sup>h</sup> Cycle delay is defined as any delay of the cycle start beyond 31 days for any given cycle

**Figure S2.** Investigator-assessed PFS by baseline TFI of > 2 years (A), >5 years (B), and >10 years (C)

**Abbreviations:** NE not estimable, NR not reached, PFS progression-free survival

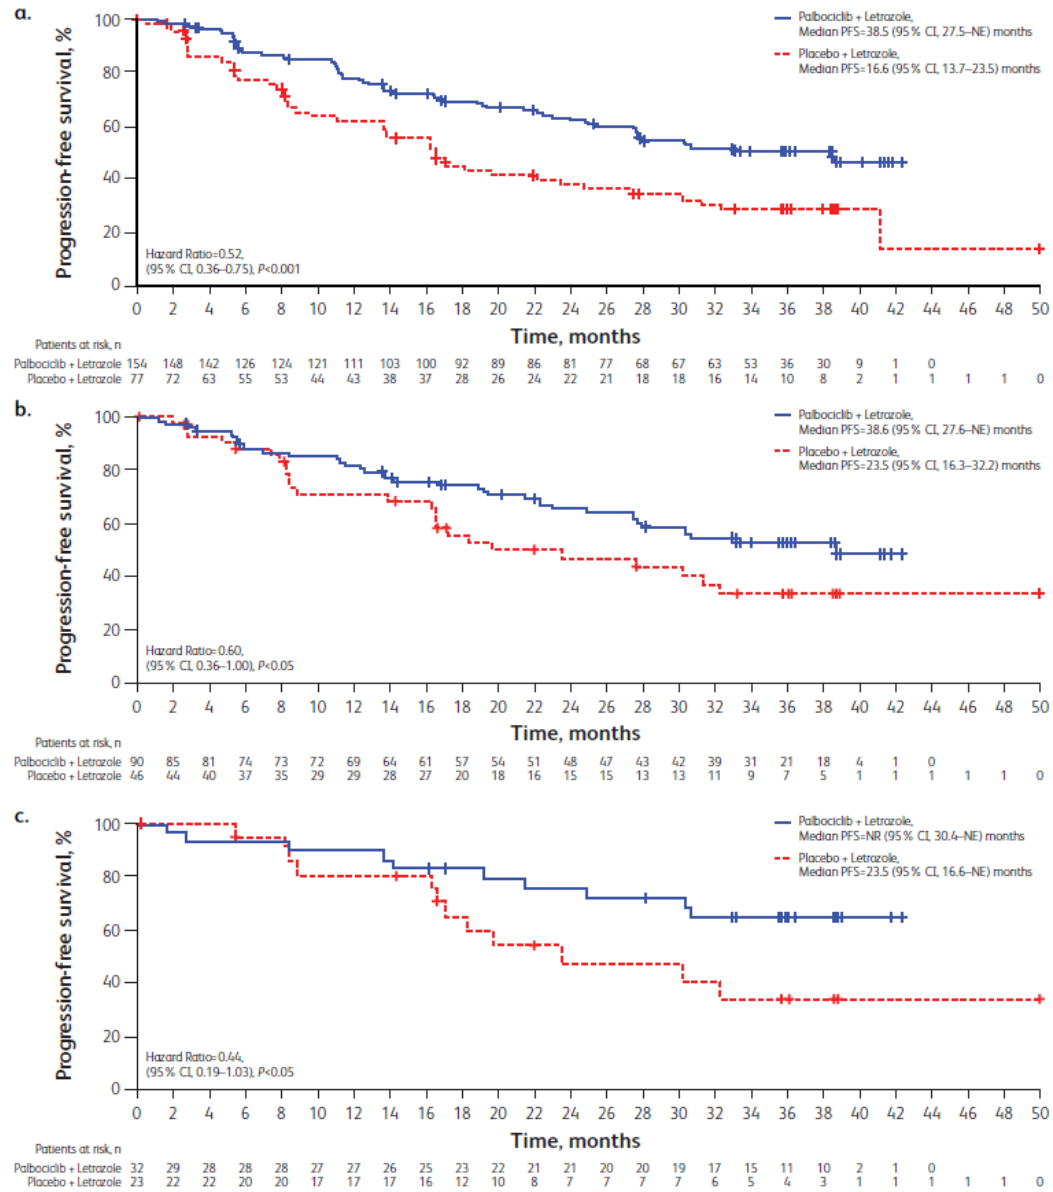

## Supplementary Text

### *Time to Second Subsequent Therapy*

Of the 138 and 97 patients in the palbociclib-letrozole and placebo-letrozole arms, respectively, who received a second subsequent therapy after discontinuing study treatment, chemotherapy was the most common treatment (63.0% and 48.5%); 36.2% and 48.5% received endocrine therapy (most commonly fulvestrant and exemestane), and 10.9% and 7.2% received everolimus (**Table S4**). A CDK4/6 inhibitor was received as the second subsequent therapy postprogression by 0.7% patients in the palbociclib-letrozole arm and by 10.3% of patients in the placebo-letrozole arm; another investigational drug was received by 5.1% and 5.2% of patients, respectively (**Table S4**).

**Figure S3.** STEPP analyses. **(a)** All patients who had received adjuvant treatment. **(b)** Patients also with visceral disease. **(c)** Patients also with nonvisceral disease

**Abbreviations:** *TFI* treatment-free interval, *PFS* progression-free survival, *STEPP* subpopulation treatment effect pattern plot

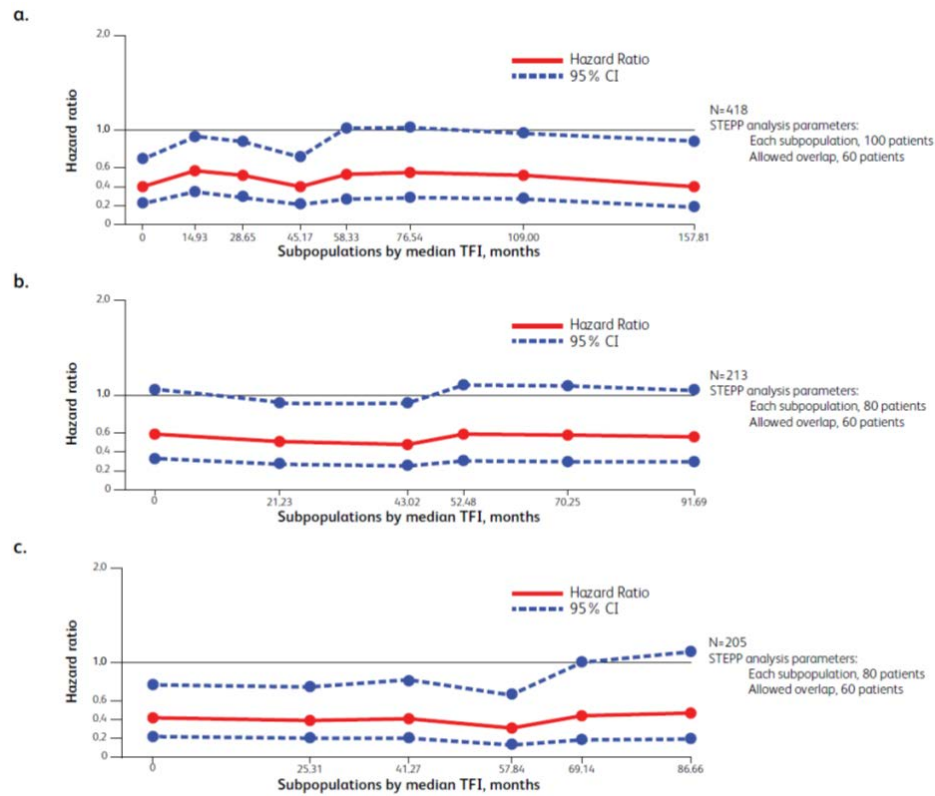

**Table S4.** Summary of first subsequent systemic anticancer therapies

| <b>Systemic Anticancer Therapy</b>                   | <b>Palbociclib + Letrozole<br/>(n=444)</b> | <b>Placebo + Letrozole<br/>(n=222)</b> |
|------------------------------------------------------|--------------------------------------------|----------------------------------------|
| <b>First subsequent therapy, n (%)<sup>a,b</sup></b> | 227 (51.1)                                 | 150 (67.6)                             |
| Endocrine therapy                                    | 138 (60.8)                                 | 87 (58.0)                              |
| Selective estrogen receptor degraders (fulvestrant)  | 70 (30.8)                                  | 44 (29.3)                              |
| Steroidal aromatase inhibitors (exemestane)          | 49 (21.6)                                  | 35 (23.3)                              |
| Selective estrogen receptor modulators               | 16 (7.1)                                   | 5 (3.3)                                |
| Nonsteroidal aromatase inhibitors                    | 3 (1.3)                                    | 3 (2.0)                                |
| CDK inhibitor                                        | 0                                          | 13 (8.7)                               |
| CDK4/6 inhibitor (palbociclib)                       | 0                                          | 13 (8.7)                               |
| Chemotherapy                                         | 83 (36.6)                                  | 51 (34.0)                              |
| Antimetabolites                                      | 35 (15.4)                                  | 23 (15.3)                              |
| Capecitabine                                         | 28 (12.3)                                  | 19 (12.7)                              |
| Fluorouracil                                         | 3 (1.3)                                    | 1 (0.7)                                |
| Gemcitabine                                          | 2 (0.9)                                    | 1 (0.7)                                |
| Gimeracil with oteracil potassium/tegafur            | 1 (0.4)                                    | 0                                      |
| Methotrexate                                         | 1 (0.4)                                    | 1 (0.7)                                |
| Tegafur                                              | 0                                          | 1 (0.7)                                |

|                                          |           |           |
|------------------------------------------|-----------|-----------|
| Taxanes                                  | 33 (14.5) | 23 (15.3) |
| Docetaxel                                | 4 (1.8)   | 4 (2.7)   |
| Paclitaxel (albumin)                     | 29 (12.8) | 19 (12.7) |
| Anthracyclines                           | 14 (6.2)  | 7 (4.7)   |
| Alkylating agents                        | 8 (3.5)   | 7 (4.7)   |
| Vinca alkaloids                          | 3 (1.3)   | 2 (1.3)   |
| mTOR inhibitor (everolimus)              | 31 (13.7) | 26 (17.3) |
| Investigational drug                     | 23 (10.1) | 17 (11.3) |
| Angiogenesis inhibitors                  | 2 (0.9)   | 0         |
| Lucitanib                                | 1 (0.4)   | 0         |
| Pazopanib                                | 1 (0.4)   | 0         |
| Aurora A kinase inhibitor (alisertib)    | 1 (0.4)   | 0         |
| Bcl-2 inhibitor (venetoclax)             | 1 (0.4)   | 0         |
| Gamma secretase inhibitor (nirogacestat) | 1 (0.4)   | 0         |
| Histone deacylate inhibitor (entinostat) | 1 (0.4)   | 0         |
| Investigational drug                     | 14 (6.2)  | 17 (11.3) |
| Blinded therapy                          | 9 (4.0)   | 11 (7.3)  |
| Investigational drug                     | 5 (2.2)   | 6 (4.0)   |
| Placebo                                  | 0         | 1 (0.7)   |
| mTOR kinase inhibitor (AZD2014)          | 1 (0.4)   | 0         |



|                             |         |         |
|-----------------------------|---------|---------|
| PARP inhibitors (veliparib) | 1 (0.4) | 0       |
| PI3K inhibitors             | 1 (0.4) | 1 (0.7) |
| BKM120                      | 0       | 1 (0.7) |
| Taselisib                   | 1 (0.4) | 0       |

---

**Abbreviations:** *Bcl-2*, B-cell lymphoma 2, *CDK* cyclin-dependent kinase, *mTOR* mechanistic target of rapamycin, *PARP* Poly (ADP-ribose) polymerase, *PI3K* phosphoinositide 3-kinase

<sup>a</sup> Percentages are calculated using n (for first subsequent therapy) as the denominator

<sup>b</sup> Single agents listed for a drug class appear in parenthesis

**Table S5.** Summary of second subsequent systemic anticancer therapies

| <b>Systemic Anticancer Therapy</b>                    | <b>Palbociclib + Letrozole<br/>(n=444)</b> | <b>Placebo + Letrozole<br/>(n=222)</b> |
|-------------------------------------------------------|--------------------------------------------|----------------------------------------|
| <b>Second subsequent therapy, n (%)<sup>a,b</sup></b> | 138 (31.1)                                 | 97 (43.7)                              |
| Endocrine therapy                                     | 50 (36.2)                                  | 47 (48.5)                              |
| Selective estrogen receptor degrader (fulvestrant)    | 23 (16.7)                                  | 17 (17.5)                              |
| Steroidal aromatase inhibitor (exemestane)            | 19 (13.8)                                  | 18 (18.6)                              |
| Selective estrogen receptor modulator                 | 7 (5.1)                                    | 7 (7.2)                                |
| Nonsteroidal aromatase inhibitor                      | 1 (0.7)                                    | 5 (5.2)                                |
| CDK inhibitor                                         | 1 (0.7)                                    | 11 (11.3)                              |
| CDK4/6 inhibitor (palbociclib)                        | 1 (0.7)                                    | 10 (10.3)                              |
| Other CDK inhibitor                                   | 0                                          | 1 (1.0)                                |
| Chemotherapy                                          | 87 (63.0)                                  | 47 (48.5)                              |
| Antimetabolites                                       | 45 (32.6)                                  | 28 (28.9)                              |
| Capecitabine                                          | 32 (23.2)                                  | 25 (25.8)                              |
| Cytarabine                                            | 2 (1.5)                                    | 0                                      |
| Fluorouracil                                          | 4 (2.9)                                    | 1 (1.0)                                |
| Gemcitabine                                           | 4 (2.9)                                    | 1 (1.0)                                |
| Gimeracil with oteracil potassium/tegafur             | 1 (0.7)                                    | 0                                      |
| Methotrexate                                          | 3 (2.2)                                    | 0                                      |

|                                       |           |           |
|---------------------------------------|-----------|-----------|
| Tegafur                               | 0         | 1 (1.0)   |
| Taxanes                               | 23 (16.7) | 12 (12.4) |
| Docetaxel                             | 4 (2.9)   | 0         |
| Paclitaxel (albumin)                  | 19 (13.8) | 12 (12.4) |
| Anthracyclines                        | 12 (8.7)  | 5 (5.2)   |
| Alkylating agents                     | 10 (7.3)  | 3 (3.1)   |
| Vinca alkaloid                        | 7 (5.1)   | 1 (1.0)   |
| mTOR inhibitor (everolimus)           | 15 (10.9) | 7 (7.2)   |
| Investigational drug                  | 7 (5.1)   | 5 (5.2)   |
| Angiogenesis inhibitor (lucitanib)    | 1 (0.7)   | 0         |
| Aurora A kinase inhibitor (alisertib) | 0         | 2 (2.1)   |
| Investigational drug                  | 4 (2.9)   | 1 (1.0)   |
| Blinded therapy                       | 1 (0.7)   | 0         |
| Investigational drug                  | 3 (2.2)   | 1 (1.0)   |
| mTOR kinase inhibitor (AZD2014)       | 1 (0.7)   | 0         |
| PI3K inhibitors                       | 1 (0.7)   | 1 (1.0)   |
| BKM120                                | 1 (0.7)   | 0         |
| Buparlisib                            | 0         | 1 (1.0)   |
| PI3K/mTOR inhibitor (gedatolisib)     | 0         | 1 (1.0)   |

---

**Abbreviations:** *CDK* cyclin-dependent kinase, *mTOR* mechanistic target of rapamycin, *PI3K* phosphoinositide 3-kinase

<sup>a</sup>Percentages are calculated using n (for second subsequent therapy) as the denominator

<sup>b</sup>Single agents listed for a drug class appear in parenthesis

**Table S6** Treatment-emergent AEs of any cause reported in >10% of patients in either arm (safety population)

|                              | Palbociclib + Letrozole |            |           |                       | Placebo + Letrozole |           |         |                      |
|------------------------------|-------------------------|------------|-----------|-----------------------|---------------------|-----------|---------|----------------------|
|                              | n=444                   |            |           |                       | n=222               |           |         |                      |
|                              | Grade                   |            |           |                       | Grade               |           |         |                      |
|                              | Any                     | 3          | 4         | 5                     | Any                 | 3         | 4       | 5                    |
| All AEs, n (%) <sup>a</sup>  | 440 (99.1)              | 284 (64.0) | 68 (15.3) | 12 (2.7) <sup>d</sup> | 213 (95.9)          | 57 (25.7) | 6 (2.7) | 4 (1.8) <sup>d</sup> |
| Hematologic AEs <sup>b</sup> |                         |            |           |                       |                     |           |         |                      |
| Neutropenia <sup>c</sup>     | 363 (81.8)              | 255 (57.4) | 52 (11.7) | 0                     | 14 (6.3)            | 2 (0.9)   | 1 (0.5) | 0                    |
| Leukopenia                   | 179 (40.3)              | 108 (24.3) | 4 (0.9)   | 0                     | 5 (2.3)             | 0         | 0       | 0                    |
| Anemia                       | 117 (26.4)              | 25 (5.6)   | 1 (0.2)   | 0                     | 21 (9.5)            | 4 (1.8)   | 0       | 0                    |
| Thrombocytopenia             | 87 (19.6)               | 6 (1.4)    | 1 (0.2)   | 0                     | 3 (1.4)             | 0         | 0       | 0                    |
| Nonhematologic AEs           |                         |            |           |                       |                     |           |         |                      |
| Infections <sup>b</sup>      | 278 (62.6)              | 29 (6.5)   | 4 (0.9)   | 1 (0.2) <sup>‡</sup>  | 100 (45.0)          | 7 (3.2)   | 0       | 3 (1.4)              |
| Fatigue                      | 176 (39.6)              | 10 (2.3)   | 0         | 0                     | 63 (28.4)           | 3 (1.4)   | 0       | 0                    |
| Arthralgia                   | 167 (37.6)              | 4 (0.9)    | —         | —                     | 80 (36.0)           | 2 (0.9)   | —       | —                    |
| Nausea                       | 165 (37.2)              | 1 (0.2)    | 0         | 0                     | 60 (27.0)           | 4 (1.8)   | 0       | 0                    |
| Alopecia                     | 149 (33.6)              | —          | —         | —                     | 36 (16.2)           | —         | —       | —                    |
| Stomatitis <sup>b</sup>      | 140 (31.5)              | 5 (1.1)    | 0         | 0                     | 33 (14.9)           | 0         | 0       | 0                    |
| Diarrhea                     | 126 (28.4)              | 6 (1.4)    | 0         | 0                     | 47 (21.2)           | 3 (1.4)   | 0       | 0                    |
| Cough                        | 118 (26.6)              | 1 (0.2)    | —         | —                     | 45 (20.3)           | 0         | —       | —                    |

|                    |            |          |         |   |           |         |   |   |
|--------------------|------------|----------|---------|---|-----------|---------|---|---|
| Back pain          | 104 (23.4) | 7 (1.6)  | —       | — | 50 (22.5) | 0       | — | — |
| Headache           | 103 (23.2) | 2 (0.5)  | —       | — | 60 (27.0) | 4 (1.8) | — | — |
| Constipation       | 96 (21.6)  | 2 (0.5)  | 0       | 0 | 35 (15.8) | 1 (0.5) | 0 | 0 |
| Hot flush          | 96 (21.6)  | 0        | —       | — | 69 (31.1) | 0       | — | — |
| Rash <sup>b</sup>  | 88 (19.8)  | 4 (0.9)  | 0       | 0 | 28 (12.6) | 1 (0.5) | 0 | 0 |
| Pain in extremity  | 82 (18.5)  | 1 (0.2)  | —       | — | 41 (18.5) | 3 (1.4) | — | — |
| Asthenia           | 80 (18.0)  | 12 (2.7) | —       | — | 27 (12.2) | 0       | — | — |
| Decreased appetite | 75 (16.9)  | 3 (0.7)  | 0       | 0 | 20 (9.0)  | 0       | 0 | 0 |
| Vomiting           | 75 (16.9)  | 4 (0.9)  | 0       | 0 | 38 (17.1) | 3 (1.4) | 0 | 0 |
| Dyspnea            | 73 (16.4)  | 6 (1.4)  | 0       | 0 | 34 (15.3) | 4 (1.8) | 0 | 0 |
| Dizziness          | 71 (16.0)  | 2 (0.5)  | —       | — | 34 (15.3) | 0       | — | — |
| Insomnia           | 69 (15.5)  | 0        | —       | — | 28 (12.6) | 0       | — | — |
| Myalgia            | 63 (14.2)  | 1 (0.2)  | —       | — | 20 (9.0)  | 0       | — | — |
| Abdominal pain     | 59 (13.3)  | 6 (1.4)  | —       | — | 15 (6.8)  | 0       | — | — |
| Dry skin           | 59 (13.3)  | 0        | —       | — | 16 (7.2)  | 0       | — | — |
| Pyrexia            | 59 (13.3)  | 0        | 0       | 0 | 20 (9.0)  | 0       | 0 | 0 |
| Peripheral edema   | 57 (12.8)  | 0        | —       | — | 15 (6.8)  | 0       | — | — |
| ALT increased      | 56 (12.6)  | 11 (2.5) | 1 (0.2) | — | 13 (5.9)  | 0       | 0 | — |
| AST increased      | 53 (11.9)  | 13 (2.9) | 0       | — | 13 (5.9)  | 2 (0.9) | 0 | — |
| Fall               | 50 (11.3)  | 3 (0.7)  | —       | — | 15 (6.8)  | 0       | — | — |

|                      |           |         |   |   |           |         |   |   |
|----------------------|-----------|---------|---|---|-----------|---------|---|---|
| Dyspepsia            | 48 (10.8) | 1 (0.2) | — | — | 27 (12.2) | 1 (0.5) | — | — |
| Musculoskeletal pain | 47 (10.6) | 1 (0.2) | — | — | 19 (8.6)  | 0       | — | — |
| Dysgeusia            | 46 (10.4) | —       | — | — | 11 (5.0)  | —       | — | — |

---

**Abbreviations:** *AE* adverse event; *ALT* alanine aminotransferase; *AST* aspartate aminotransferase, *MedDRA* Medical Dictionary for Regulatory Activities, *PT*

preferred term, *URTI* upper respiratory tract infection, *UTI* urinary tract infection

<sup>a</sup> All AEs regardless of suspected causal relationship to the study medication; MedDRA (v20.0) coding dictionary applied

<sup>b</sup> Clustered PTs (any event having a PT that is equal to those listed): anemia includes the PTs anemia, hematocrit decreased, and hemoglobin decreased; infections includes any PT under the system organ class infections and infestations; leukopenia includes leukopenia and white blood cell count decreased; neutropenia includes neutropenia and neutrophil count decreased; rash includes dermatitis, dermatitis acneiform, rash, rash erythematous, rash maculopapular, rash popular, rash pruritic, and toxic skin eruption; stomatitis includes aphthous stomatitis, cheilitis, glossitis, glossodynia, mouth ulceration, mucosal inflammation, oral pain, oropharyngeal discomfort, oropharyngeal pain, and stomatitis; thrombocytopenia includes platelet count decreased and thrombocytopenia

<sup>c</sup> In the palbociclib-letrozole arm, grade 3 and 4 febrile neutropenia were reported in 7 (1.6%) and 1 (0.2%) patients, respectively, at the time of the primary analysis (data cutoff date February 26, 2016) and in 7 (1.6%) and 2 (0.5%) patients after the additional 15 months of follow-up (data cutoff date May 31, 2017). The later data cutoff date included an additional 1 (0.2%) patient who developed grade 4 febrile neutropenia with a very slight fever (38.2 °C) 1 week after the study drug was permanently discontinued. Because the onset of grade 3 or 4 febrile neutropenia takes a median 28 days to emerge after palbociclib is stopped and residual neutropenia is not uncommon for chemotherapy (nab-paclitaxel was the subsequent line of treatment) 7 days after its discontinuation, the chemotherapy appears to contribute to this SAE.

<sup>d</sup> Grade 5 AEs in the palbociclib-letrozole arm were disease progression (n=3), infection (pneumonia) and respiratory failure, pulmonary embolism, acute myocardial infarction, breast cancer, breast cancer metastatic, cardiogenic shock, cardiopulmonary failure, cardiovascular insufficiency and death (all n=1):

note, 1 patient had grade 5 pneumonia (infection) and grade 5 respiratory failure; grade 5 AEs in the placebo-letrozole arm were infections (n=3), pulmonary embolism, and cardiac arrest (both n=1); note: grade 5 pulmonary embolism and grade 5 lower respiratory tract infection were reported in 1 patient.
